# Supplementary material for: Comprehensive assessment of paddy soil quality under land consolidation: a novel perspective of microbiology
Source: PeerJ. 2019 Jul 22;7:e7351. doi: 10.7717/peerj.7351 (PMC6657742; doi:10.7717/peerj.7351)
Supplement: Supplemental Information 1 — Data of soil physical and chemical properties, heavy metal content and microbial indicators of all samples in this work. [file peerj-07-7351-s001.xlsx]

## Sheet: Sheet1
Number	SWC（%）	pH	OM（g/kg）	AP（mg/kg）	AK （μg/ml）	TN （g/kg）	Cu（mg/kg）	Cd（mg/kg）	Pb（mg/kg）	Cr（mg/kg）	As（mg/kg）	Hg（mg/kg）	Ni（mg/kg）	Zn（mg/kg）	MBP（mg/kg）	MBC（mg/kg）	MBN（mg/kg）	BS	BC	FS	FC	BFD
1	34.8518	7.92	35.2	27.5729	25.2	1.8125	36	2.8	34.3	219	3.26	0.564	51	104	5.77	961	20.4	7.43392	6030.17	3.66535	736.884	0.433026
2	53.599	6.535	43.2	159.554	34.15	3.4605	34	2.34	20	200	1.29	0.48	47	98.1	7.04	860	20.1	7.34105	5533.59	3.5126	812.143	0.645489
3	21.7	7.995	34.8	63.2262	27.2	1.925	36	2.49	25	216	1.15	0.604	67	99.2	48.7	956	21.7	6.8209	3994.56	4.19069	770.845	0.42349
4	34.1034	6.83	27.4	71.171	51.7	2.039	30	1.54	38.1	201	6.88	0.584	46	76.7	38.2	235	19.1	7.03182	4909.72	2.71176	745.655	0.588862
5	30.6444	6.485	39.2	61.2504	23.8	2.2485	39	2.01	41.4	203	10.3	0.372	51	96	15.2	156	16.4	7.13604	4728.1	4.05377	570.963	0.415029
6	34.5984	7.44	58.4	86.6949	67.7	2.54	47	2.66	28.2	236	1.55	0.488	60	124	15.1	285	56.7	7.08254	5462.22	2.74669	575.765	0.560818
7	27.9469	7.29	59.3	99.2261	27.15	3.196	51	2.11	46.2	215	7.83	0.349	55	140	25.1	786	23.8	7.35302	5772.04	3.94201	635.679	0.412781
8	39.5123	7.005	24.4	48.768	16.05	1.678	41	1.99	34.9	220	7.75	0.227	53	103	4.85	420	29.1	7.63608	6876.1	4.23642	437.118	0.404294
9	25.6149	8.295	16	17.9026	18.5	0.9315	31	1.78	32.9	199	11.1	0.181	48	91.1	40.1	154	17.5	7.20195	5272.92	2.91298	438.448	0.401779
10	47.82	7.26	67.3	37.4516	31	3.282	35	2.21	30.1	215	0	0.365	59	120	45.1	451	75.3	7.54975	6248.5	2.75625	785.485	0.540238
11	54.1796	6.69	34.1	65.4764	17.35	1.4415	25	2.01	27.7	195	11.8	0.318	56	81.1	11.2	641	17.5	7.33839	6005.85	3.84384	738.885	0.401003
12	50.5476	7.68	70.4	48.4765	25.05	3.359	34	2.2	38.1	213	9.48	0.778	59	105	8.11	1040	17.5	7.31341	5554.7	3.57418	791.909	0.399958
13	35.7668	7.73	27.7	21.5574	22.7	1.7245	49	2.37	36.1	205	8.76	0.695	56	158	26.6	475	23.4	7.64731	7127.65	4.08686	827.375	0.531647
14	36.3425	6.165	48.3	30.3167	17.2	2.3665	38	2.47	42	219	8.6	0.791	52	127	50.8	1030	23	6.99272	4579.45	3.55252	676.71	0.397986
15	46.4176	8.17	49.1	39.7725	37.8	2.204	59	2.72	60.6	244	2.5	0.804	53	167	19.6	807	63.5	7.55183	6020.3	4.00471	685.761	0.530679
16	46.3484	7.67	44.6	22.303	23.8	2.302	44	2.28	54.8	219	5.58	0.641	50	198	54.8	936	17.5	7.4264	5712.4	4.53686	327.067	0.396291
17	34.6879	8.095	23.2	8.55956	21.75	1.5195	33	2.21	28.7	204	2.02	1.06	37	90.5	16.5	607	27.5	7.2435	4464.47	0.516423	155	0.516876
18	27.3295	6.325	29.2	87.2059	20.75	1.8415	46	2.02	31.9	196	0	0.321	61	70.6	26.2	255	17.7	7.36633	5313.75	3.64787	440.6	0.391352
19	33.9823	6.925	25.6	62.575	19.25	1.6805	29	2.33	24.2	201	1.61	0.596	55	87.4	14	352	57.1	7.57491	6235.07	3.90506	643.239	0.389167
20	42.2296	6.54	60	29.472	15.7	2.96	48	2.4	44.7	212	1.57	0.427	39	123	68.3	910	85.1	7.39902	5403.4	2.97936	490.391	0.489419
21	46.1418	7.665	32.6	29.1112	33.7	1.664	45	1.73	36.7	205	11.4	1.38	56	98.8	35.8	962	87.1	7.39038	5955.6	4.16176	281	0.387366
22	35.456	7.185	36.6	31.5357	36	1.542	46	1.73	33.5	224	12	0.085	63	116	15	225	37.7	7.0026	4197.01	4.65476	396	0.488461
23	31.9051	6.595	51.5	25.2713	19.8	2.7695	38	1.57	45.5	214	3.5	0.17	60	103	2.07	139	23.5	7.3027	5371.68	4.24558	550	0.386695
24	30.5131	7.785	40.8	31.9784	35.75	2.1	43	2.56	32.3	232	1.76	0.349	73	122	15.2	448	21.8	7.47267	6451.1	3.46245	603.353	0.468007
25	44.7045	6.93	56.3	21.8319	22.7	2.673	44	2.31	45.9	227	2.36	0.557	61	122	8.41	1030	27.8	7.57951	6502.07	1.61784	593.857	0.385163
26	27.3194	8.16	27.2	16.0823	14.45	1.404	31	2.2	30.8	206	0	0.658	45	89.2	34.6	160	22.8	7.52347	6172.92	3.95506	653.386	0.466133
27	40.8443	6.775	50.6	93.3219	22.25	2.426	41	2.38	45.8	218	1.36	1.11	59	124	59.1	242	22.3	7.49897	6259.05	4.79301	677.902	0.382535
28	36.897	7.745	29.9	76.0907	36.75	1.235	51	2.91	37.8	228	1.6	0.523	75	119	3.31	943	19.2	7.3209	5132.05	2.7169	600.622	0.465373
29	47.4627	6.385	53.6	53.6964	17.05	2.706	51	2.25	53.3	213	6.34	0.668	52	133	50.1	854	15.5	7.29162	5780.3	4.51832	683.549	0.38118
30	37.2467	7.11	32.8	29.5783	26.05	2.085	45	2.54	77.5	213	1.29	0.554	43	123	20.7	939	25.4	7.20052	5621.92	3.79942	556.323	0.463084
31	40.8244	6.65	49	124.082	33	2.362	36	2.25	34.2	212	0.81	0.468	59	104	5.53	366	46.4	7.58041	6593.3	0.789495	443.06	0.376085
32	34.5307	7.015	28.8	24.0673	28.15	1.228	41	2.06	35.2	211	4.51	0.31	51	105	3.39	480	24.4	7.20032	5919.1	3.79965	489.2	0.452514
33	46.6625	7	31	90.0115	29.65	1.951	44	2.65	36.3	231	2.88	0.394	55	125	31.7	415	24.2	7.42109	5785.8	3.36465	629.366	0.375515
34	36.3873	7.82	32.4	50.7792	24.25	2.133	42	1.85	43.7	213	6.63	0.435	43	102	10.7	304	85.4	7.31435	5621.68	3.66353	843.1	0.444299
35	35.6194	7.17	30.8	41.0102	31.35	1.556	37	2.16	40.3	229	0	0.497	52	99.7	42.1	283	58.7	7.39275	5931.42	3.82746	743.674	0.443598
36	36.4313	6.77	36.5	229.426	33.1	2.0485	37	1.6	48.6	212	5.57	0.557	50	109	24.1	350	105	7.6486	6878.95	3.0618	951.485	0.370984
37	30.7366	7.54	22.9	98.4229	56.65	1.338	42	2.06	47.2	210	9.91	0.902	50	121	22.3	657	32	6.80774	3229.75	4.41051	557.467	0.443147
38	20.7042	7.39	21.4	123.968	52.8	1.3165	41	2.3	33.4	209	1.25	0.387	60	117	51.2	415	32	6.5076	2522.02	2.78878	321.588	0.440353
39	26.5012	8.23	18.8	32.633	20.3	1.005	46	2.62	36.2	231	2.63	0.298	64	131	46.1	728	17.7	7.52285	6177.26	5.02039	585.625	0.437763
40	38.1926	7.535	24.6	53.6062	21.5	1.401	40	2.45	30.2	228	2.11	0.487	49	119	62.3	373	21.8	7.58351	6289.25	4.40162	478.053	0.361392
41	41.4876	8.01	53.3	330.794	41.3	2.461	84	2.34	54.3	203	2.88	0.436	54	139	51.7	182	45.7	7.28004	5193.19	2.03047	725.072	0.436971
42	49.1627	8.215	55	76.1809	42.9	2.093	50	2.33	50.4	209	2.29	0.286	51	156	55.4	799	22.1	7.29307	5371.16	4.61264	603.55	0.358292
43	36.9993	7.195	67.5	273.561	80.25	3.693	62	1.96	48.9	201	10.1	0.719	55	147	45.8	841	27.1	7.32386	5478.98	4.0728	875.058	0.436644
44	46.141	6.625	65	107.285	34.2	3.75	57	2.19	43.4	215	0	0.387	53	129	29.9	869	23.7	7.4851	6271.44	3.97918	833.976	0.324114
45	33.9362	7.855	32.3	27.9944	34.4	1.6765	35	2.55	32.6	223	2.44	0.423	60	102	14.9	805	20.6	7.36624	5590.54	4.57788	637.053	0.433708
